# Supplementary material for: Learning the protein language of proteome-wide protein-protein binding sites via explainable ensemble deep learning
Source: PubMed Central journal article supplement (PMC9849350; doi:10.1038/s42003-023-04462-5), 2023-01-19
Supplement: 42003_2023_4462_MOESM1_ESM.pdf [file 42003_2023_4462_MOESM1_ESM.pdf]

## Supplementary Material

### a Predict protein-protein binding site

⚠ Since extracting ProtT5 and PSSM is resource intensive, we will guide you through this prediction

#### 1. Extract ProtT5 features via colab or your own device.

1. Extract ProtT5 features via colab or your own device.

Case - 1 Case - 2 Case - 3

If you want to extract features through your own device, then follow these steps:

- Create a virtual environment with the following code:

```
conda create env -n prott5
conda activate prott5
pip install requirement.txt
```
- Download the *requirement.txt* and code we provide via the following link:  
[DOWNLOAD](#)
- Open our code via *vscode* or the *jupyter* provided by *Anaconda*

1. Extract ProtT5 features via colab or your own device.

Case - 1 Case - 2 Case - 3

If you want to extract features through *colab*, then follow these steps:

- Jump to *colab* and run it directly through the following link  
[COLAB](#)
- Copy one sequence at a time to replace the *example* in the code

### b 3. Upload the prepared file.

3. Upload the prepared file.

Upload ProtT5 Upload PSSM Submit

Upload your ProtT5 feature, it must be *.npy* and the dimension is [1, length, 1024]

Drag & drop files here ...

Select file... [Browse ...](#)

3. Upload the prepared file.

Upload ProtT5 Upload PSSM Submit

Upload your PSSM feature, it must be *.pssm* .

Drag & drop files here ...

Select file... [Browse ...](#)

### c Download Datasets & Code & Model

[Download Datasets](#) [Download Code](#)

We provide 5 datasets for download, respectively, Dset\_72, Dset\_164, Dset\_186, Dset\_448 and Dset\_880

We provide the code for training, prediction and feature extraction with instructions for use.

[DOWNLOAD NOW](#) [DOWNLOAD NOW](#)

**Supplementary Figure 1** Schematic diagram of web server functional modules. (A) Guidance Control: Guides users for extracting ProtT5 in defined situations. (B) Submit Form: The user can submit ProtT5 and PSSM for the server to complete the prediction. (C) Download Module: Provides high-speed download links for data sets, code, and pre-trained models.

**Supplementary Table 1.** Details of the training and test sets of our study.

|       | Dataset  | ResiduesNumber | Binding Ratio % |
|-------|----------|----------------|-----------------|
| Train | Dset_843 | 450 598        | 10.14           |
|       | Dset_186 | 36 219         | 15.23           |
| Test  | Dset_72  | 18 140         | 10.60           |
|       | Dset_164 | 33 681         | 18.10           |
|       | Dset_448 | 116 500        | 13.57           |

**Supplementary Table 2.** Hyperparameter candidates and optimal parameter combinations for the traditional machine learning algorithms.

| Algorithms | Parameter Candidate Values                                                                                             | Optimal parameters               |
|------------|------------------------------------------------------------------------------------------------------------------------|----------------------------------|
| XGBoost    | {'max_depth': [3, 4, 5, 6, 7, 8], 'eta':[0.001, 0.01, 0.1], 'gamma':[0, 0.001, 0.01], 'n_estimators':[100, 500, 1000]} | [4, 0.01, 0, 500]                |
| CatBoost   | {'depth': [5, 6, 7], 'learning_rate' : [0.01, 0.03, 0.1], 'l2_leaf_reg': [1, 4, 9], 'iterations': [100, 300, 1000]}    | [7, 0.1, 9, 300]                 |
| LGBM       | {'n_estimators':range(100, 500, 100), 'learning_rate':[0.01, 0.05, 0.1], 'feature_fraction':[0.7, 1]}                  | [400, 0.1, 0.7]                  |
| SGD        | {'loss':['log', 'modified_huber'], 'penalty':['l2', 'l1', 'elasticnet'], 'alpha':[0.0001, 0.001, 0.01]}                | ['huber', 'elasticnet', '0.001'] |
| MLP        | {'solver':['lbfgs', 'sgd', 'adam'], 'alpha':[1e-5, 1e-4, 0.001, 0.01]}                                                 | ['lbfgs', 1e-5]                  |
